# Supplementary material for: Representations of Codeine Misuse on Instagram: Content Analysis
Source: JMIR Public Health Surveill. 2018 Mar 20;4(1):e22. doi: 10.2196/publichealth.8144 (PMC5883072; doi:10.2196/publichealth.8144)
Supplement: Multimedia Appendix 1 [file publichealth_v4i1e22_app1.pdf]

## Multi-Media Appendix 1: Opioid-Related Hashtags, definitions and examples

| Hashtag and definition                                                                                                                                                                                             | Example                                                                             | Photo description and caption                                                                                                                                                                                                                                                                                                                                                      |
|--------------------------------------------------------------------------------------------------------------------------------------------------------------------------------------------------------------------|-------------------------------------------------------------------------------------|------------------------------------------------------------------------------------------------------------------------------------------------------------------------------------------------------------------------------------------------------------------------------------------------------------------------------------------------------------------------------------|
| <b>#Actavis</b><br>A pharmaceutical company that discontinued its manufacture of promethazine or codeine cough syrup because of “unlawful and dangerous use of the product...contrary to its approved indication.” | 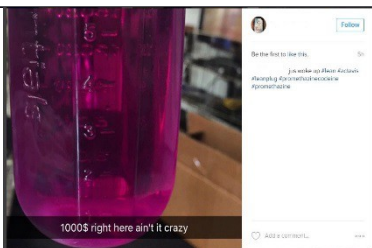   | Image of purple liquid in measuring bottle with overlay saying “1000\$ right here aint it crazy.”<br>Caption reads: jus woke up #lean #actavis #leanplug #promethazinecodeine #promethazine                                                                                                                                                                                        |
| <b>#CodeineCrazy</b><br>The title of a popular song by trap artist, Future. It has been viewed more than 18 million times on YouTube.                                                                              | 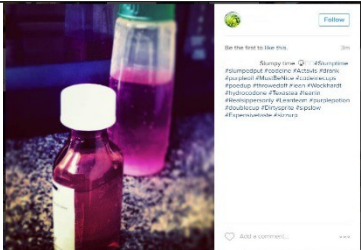   | Purple liquid in a bottle and a medicine bottle containing liquid.<br>Caption reads: slumpy time (smiley face emoji)<br>#Slumptime #slumpedout #codeine #Actavis #drank #purpleoil #MustBeNice #codeinecups #poedup #threwedoff #lean #Wockhardt #hydrocodone #Texastea #leanin #Realsippersonly #Leanteam #purplepotion #doublecup #Dirtysprite #sipslow #Expensivetaste #sizzurp |
| <b>#DoubleCup</b><br>The signature container for the consumption of lean, made of two nested white Styrofoam cups.                                                                                                 | 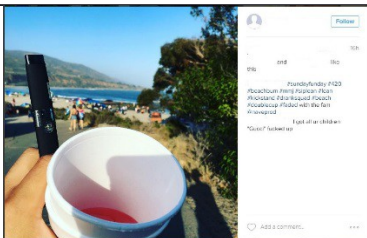  | Image of reddish liquid in a double styrofoam cup and a vaporizer pen.<br>Caption reads: #sundayfunday #420 #beachbum #mmj #siplean #lean #kickstand #dranksquad #beach #doublecup #faded with the fam                                                                                                                                                                             |
| <b>#OilMobb</b><br>This term derives from the viscous, oil-like consistency promethazine or codeine cough syrup.                                                                                                   | 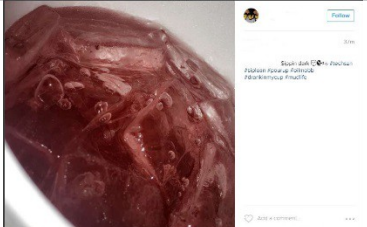 | Image of purplish liquid and ice in a styrofoam cup.<br>Caption reads: Sippin dark (cat emoji) (sleep emoji)<br>#techszn #siplean #pourup #oilmob #drankinmycup #mudlife                                                                                                                                                                                                           |
| <b>#Promethazine</b><br>The name of a common antihistamine with strong sedative effects. It is often mixed with codeine to treat against cough                                                                     | 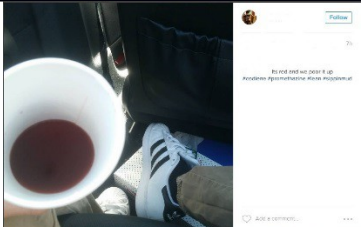 | Image of dark liquid in styrofoam cup in car.<br>Caption reads: its red and we poor it up #codeine #promethazine #lean #sippinmud                                                                                                                                                                                                                                                  |
| <b>#Qualitest</b><br>A pharmaceutical company that manufactures promethazine or codeine cough syrup                                                                                                                | 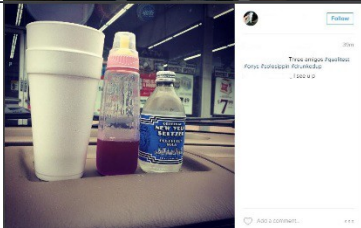 | Image of double styrofoam cup, baby bottle with purple liquid, and a bottle of seltzer.<br>Caption reads: three amigos #qualitest #onys #solosippin #drunkedup                                                                                                                                                                                                                     |

|                                                                                                                                                                                               |                                                                                                                                                                       |                                                                                                                                                                                                                                                                                                                                        |
|-----------------------------------------------------------------------------------------------------------------------------------------------------------------------------------------------|-----------------------------------------------------------------------------------------------------------------------------------------------------------------------|----------------------------------------------------------------------------------------------------------------------------------------------------------------------------------------------------------------------------------------------------------------------------------------------------------------------------------------|
| <p><b>#SipLean</b><br/>Refers to the slow consumption of lean and a clothing or accessory brand</p>                                                                                           | 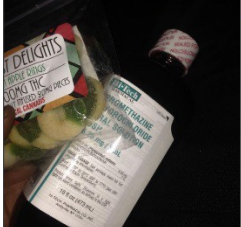 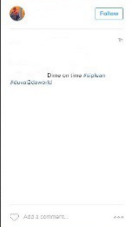   | <p>Image of promethazine hydrochloride with apple ring gummy candy.<br/>Caption reads: dime on time #siplean #duval2daworld</p>                                                                                                                                                                                                        |
| <p><b>#Sizzurp</b><br/>Another name for promethazine or codeine cough syrup</p>                                                                                                               | 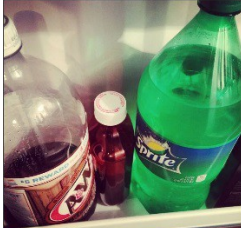 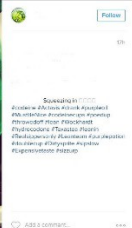   | <p>Image of soda and medicine bottle in the shelf of a fridge.<br/>Caption reads: squeezing in #codeine #Actavis #drank #purpleoil #MustBeNice #codeinecups #poedup #threwedoff #lean #Wockhardt #hydrocodone #Texastea #leanin #Realsippersonly #Leanteam #purplepotion #doublecup #Dirtysprite #sipslow #Expensivetaste #sizzurp</p> |
| <p><b>#TexasTea</b><br/>Another name for promethazine or codeine cough syrup mixed with soda and occasionally hard candy; emphasizes the origins of lean or "purple drank" in Houston, TX</p> | 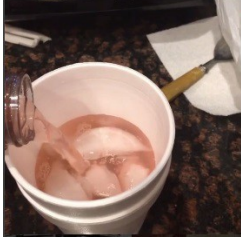 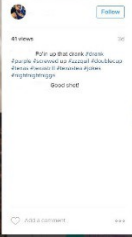   | <p>Image of clear liquid being poured into double styrofoam cup with ice and light pink liquid.<br/>Caption reads: po'in up that drank #drank #purple #screwed up #zzzquil #doublecup #texas #texastrill #texastea #jokes #nightnightn * * * *</p>                                                                                     |
| <p><b>#Wockhardt</b><br/>A pharmaceutical company that manufactures promethazine with codeine cough syrup</p>                                                                                 | 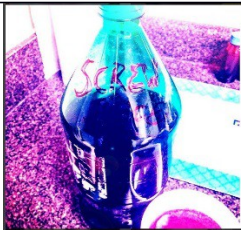 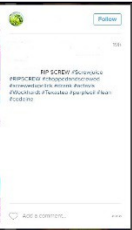 | <p>Image of soda bottle with label removed and purple liquid in cup.<br/>Caption reads: RIP SCREW #Screwjuice #RIPSCREW #choppedandscrewed #screwedupclick #drank #actavis #Wockhardt #Texastea #purpleoil #lean #codeine</p>                                                                                                          |
