# Supplementary material for: Representations of Codeine Misuse on Instagram: Content Analysis
Source: JMIR Public Health Surveill. 2018 Mar 20;4(1):e22. doi: 10.2196/publichealth.8144 (PMC5883072; doi:10.2196/publichealth.8144)
Supplement: Multimedia Appendix 2 [file publichealth_v4i1e22_app2.pdf]

## Multimedia Appendix 2: Themes, definitions, and examples.

| Theme and definition                                                                                                                                                                                        | Frequency n (%) | Example                                                                              | Photo description and caption                                                                                                                                                                                                                                                                                                                                                                                                                                                                                                           |
|-------------------------------------------------------------------------------------------------------------------------------------------------------------------------------------------------------------|-----------------|--------------------------------------------------------------------------------------|-----------------------------------------------------------------------------------------------------------------------------------------------------------------------------------------------------------------------------------------------------------------------------------------------------------------------------------------------------------------------------------------------------------------------------------------------------------------------------------------------------------------------------------------|
| <b>Use-behavior</b><br>Posts where image solely depicted codeine or lean (a preparation of promethazine or codeine with ice, and soda; occasionally hard candies are added, mostly commonly Jolly Ranchers) | 50 (50%)        | 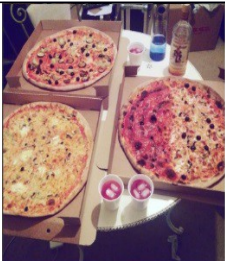    | Image of pizzas on a table with three cups of lean, a bottle of Captain Morgan rum, and Ciroc vodka.<br>Caption reads: THREE 18" PIZZAS IN THIS BITCH TIME TO FEAST UP!!!! #pizza #feast #pizzas #hungry #food #foodporn #foodgasm #italian #lean #sizzurp #syrup #syrup #codeine #ciroc #rum #vodka #cheese #eat                                                                                                                                                                                                                       |
| <b>Preparation</b><br>Still images or videos of lean being made.                                                                                                                                            | 18 (18%)        | 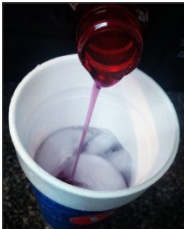   | Image of purple syrup being poured into cup with ice.<br>Caption reads: fountains #codeine #Actavis #drank #purpleoil #MustBeNice #codeinecups #poedup #throwedoff #lean #Wockhardt #hydrocodone #Texastea #leanin #Realsippersonly #Leanteam #purplepotion #doublecup #Dirtysprite #sipslow #Expensivetaste #sizzurp                                                                                                                                                                                                                   |
| <b>Polysubstance use</b><br>Posts that displayed the misuse of codeine alongside the use of other substances, such as alcohol and cannabis.                                                                 | 11 (11%)        | 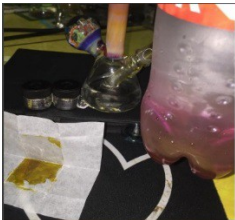  | Soda bottle with layer of purple liquid at the bottom, surrounded by a water pipe and cannabis concentrate.<br>Caption reads: kickin the weekend off right (devil emoji) (ok-hand symbol) (fire symbol) #oilmob #Friday #bitxhimhigh #losangeles #oilmob #lostinthesauce                                                                                                                                                                                                                                                                |
| <b>Sale</b><br>Images or videos that displayed bulk quantities of codeine and also had indication in the username, hashtags, or free-text that suggested sale                                               | 11 (11%)        | 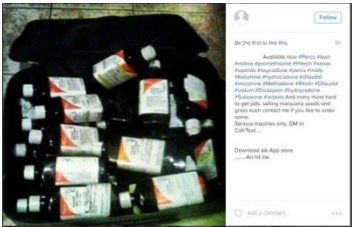 | Image of a bag full of promethazine or codeine cough syrup.<br>Caption reads: available now #Percs #lean #mdma #promethazine #Hitech #xanax #opanas #oxycodone #percs #molly #Ketamine #hydrocodone #dilaudid #morphine #Methadone #Ritalin #Dilaudid #morphine #Methadone #Ritalin #dilaudid #valium #Diazepam #hydrocodone #Suboxone #actavis And many more hard to get pills. Selling marijuana seeds and grass kush contact me if you like to order some. Serious inquiries only. DM or Call/text....###-###-#### (number censored) |

|                                                                                                                                                                                                                                                                        |               |                                                                                     |                                                                                                                                                                                                                                                                                                                                                    |
|------------------------------------------------------------------------------------------------------------------------------------------------------------------------------------------------------------------------------------------------------------------------|---------------|-------------------------------------------------------------------------------------|----------------------------------------------------------------------------------------------------------------------------------------------------------------------------------------------------------------------------------------------------------------------------------------------------------------------------------------------------|
| <p>Pop culture</p> <p>Posts where codeine misuse is associated with pop-culture symbols, icons, or personas</p>                                                                                                                                                        | <p>4 (4%)</p> | 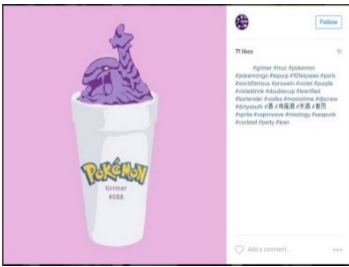  | <p>Image of pokemon character, Grimer, coming out of a styrofoam cup.</p> <p>Caption reads: #grimer #muc #pokemon #pokemongo #lepup #101elysees #paris #worldfamous #prowein #violet #purple #violetdrink #doublecup #leanified #bartender #vodka #moonshine #djscrew #dirtysouth #sprite #vaporwave #mixology #seapunk #cocktail #party #lean</p> |
| <p>Commercialization</p> <p>Posts that displayed the sale of products bearing common symbols or language associated with codeine misuse. In contrast to sale, commercialization identified posts that sought to sell codeine-related products, not codeine itself.</p> | <p>4 (4%)</p> | 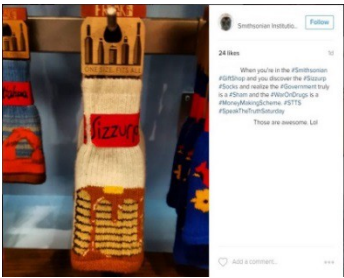  | <p>Image of a bottle koozie with the word “Sizzurp” written on it.</p> <p>Caption reads: when you're in the #Smithsonian #GiftShop and you discover the #Sizzurp #Socks and realize the #Government truly is a #Sham and the #WarOnDrugs is a #MoneyMakingScheme. #STSS #SpeakTheTruthSaturday</p>                                                 |
| <p>Hip-Hop</p> <p>Posts where hip-hop artists were portrayed in the image or video, especially those whose music contain references to codeine misuse (eg, 36 Mafia, Future, and Lil' Wayne).</p>                                                                      | <p>3 (3%)</p> | 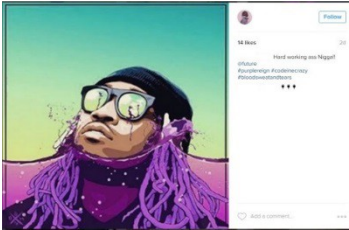 | <p>Image of hip-hop artist Future floating in purple liquid.</p> <p>Caption reads: hard working ass N****!!.</p> <p>@future #purplereign #codeinecrazy #bloodsweatandtears</p>                                                                                                                                                                     |
